# Supplementary material for: Sialomucin CD43 Plays a Deleterious Role in the Development of Experimental Heart Failure Induced by Pressure Overload by Modulating Cardiac Inflammation and Fibrosis
Source: PubMed Central journal article supplement (PMC8678270; doi:10.3389/fphys.2021.780854), 2021-12-03
Supplement: Data_Sheet_1.pdf [file Data_Sheet_1.pdf]

Figure 1s

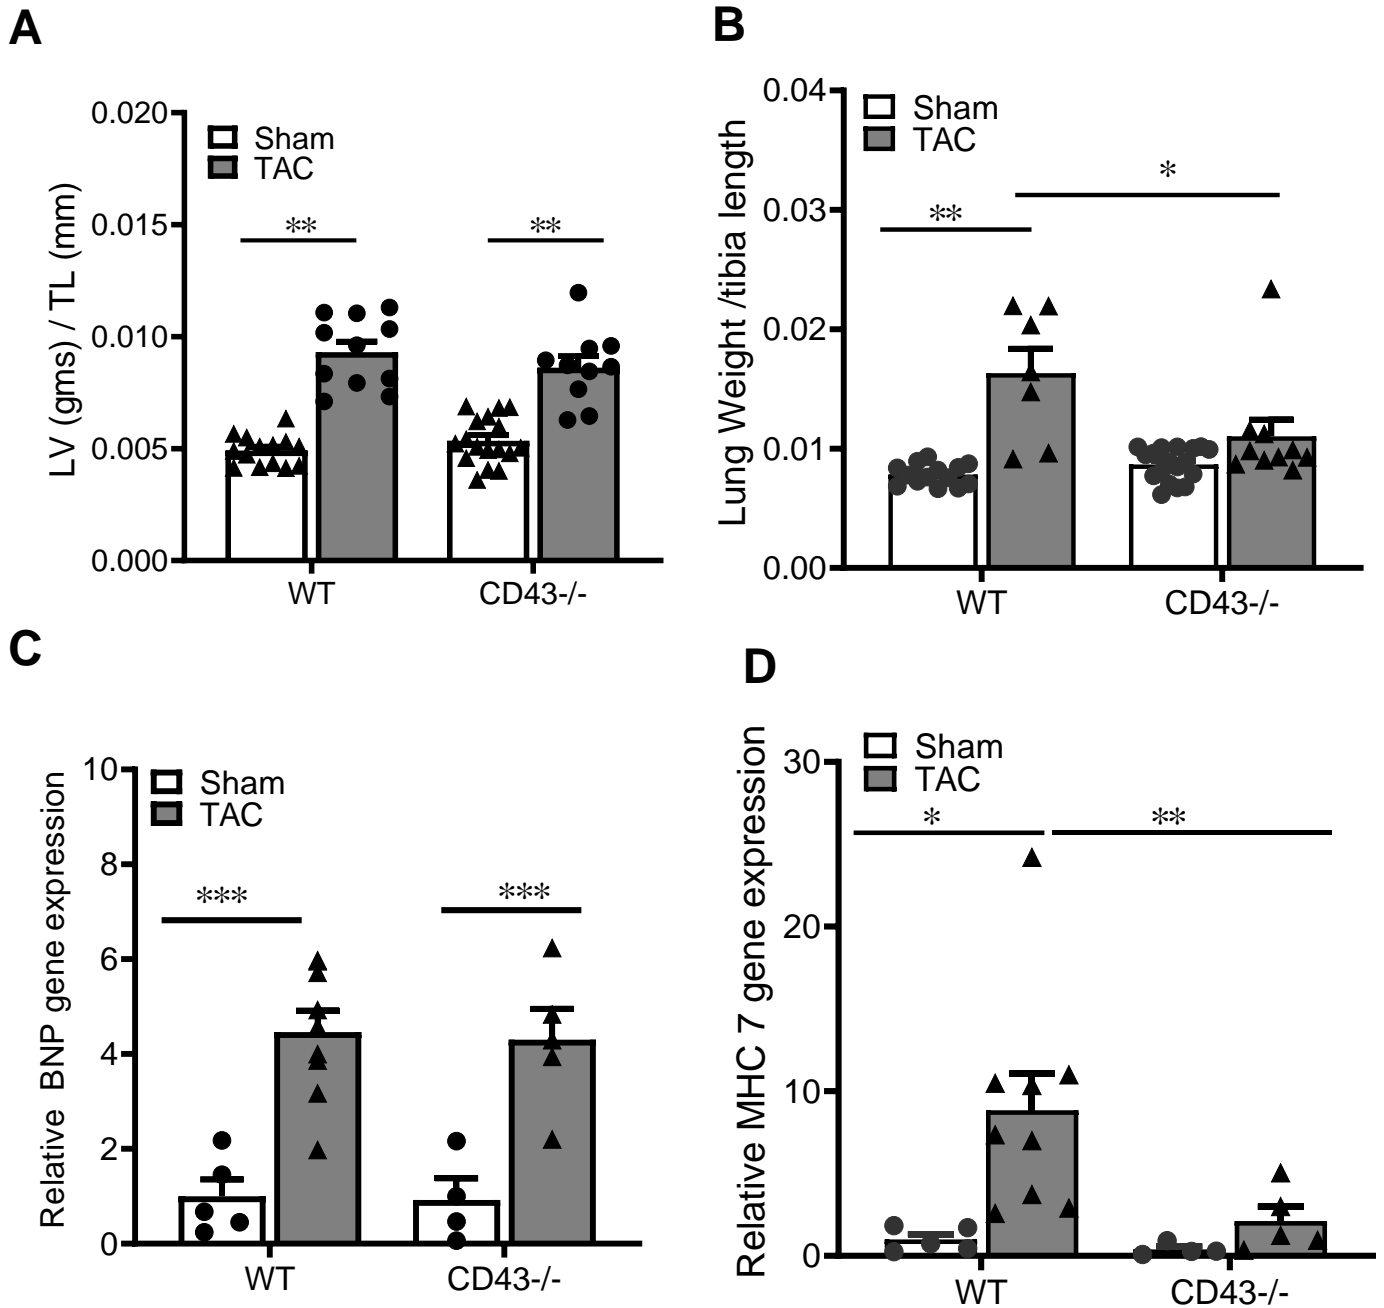

**Figure 1S: CD43<sup>-/-</sup> mice present similar levels of cardiac hypertrophy, do not develop pulmonary edema and have significantly reduced expression of MHCβ expression compared to WT mice in response to TAC.**

A). Changes in LV weight normalized to tibia length in response to TAC in WT and CD43<sup>-/-</sup> mice. B) Changes in Lung Weight in response to TAC in WT and CD43<sup>-/-</sup> mice. C) Quantification of gene expression of BNP (C) and MHCβ (D) from heart lysates 4 weeks after Sham or TAC surgery. Data is presented as mean±SEM, n=4–6 in each group. \*p<0.05, \*\*p<0.01

Figure 2s

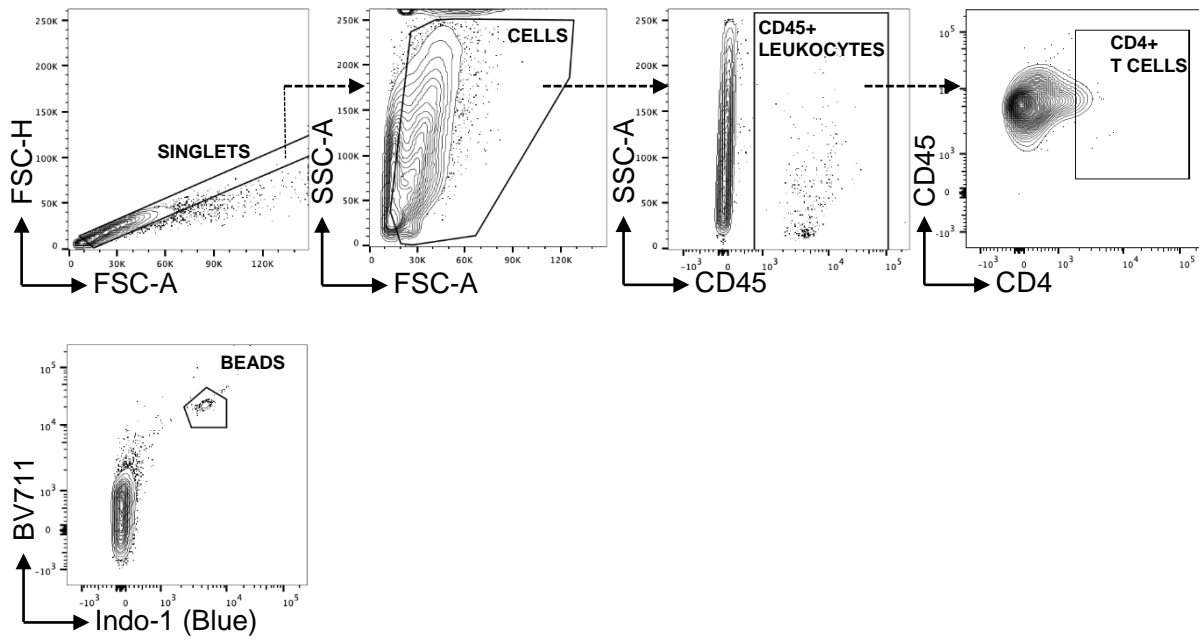

**Figure 2S: Representative gating strategy for detection of CD4+ cells in heart.** The bottom left panel gate represents the counting beads, which are used for quantification of cell number.

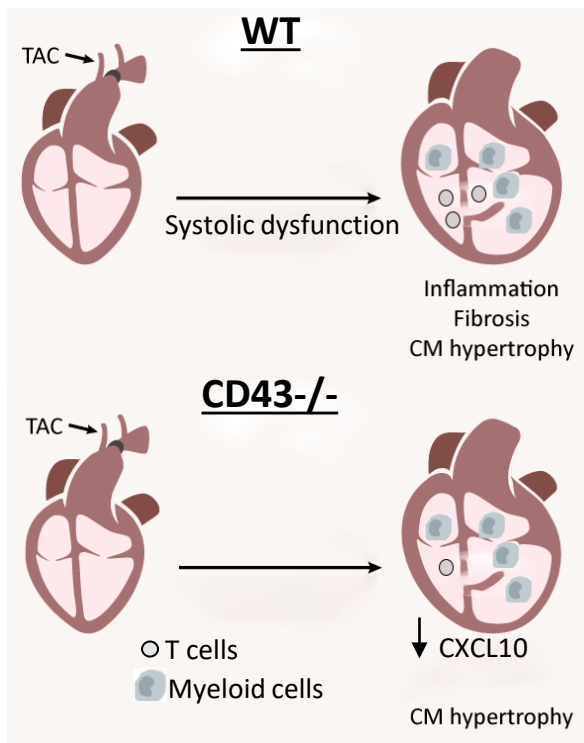

**Graphical abstract: CD43 modulates cardiac inflammation and systolic dysfunction in experimental heart failure**
